# Supplementary material for: Influence on [18F]FDG uptake by cancer cells after anti-PD-1 therapy in an enforced-immune activated mouse tumor
Source: PubMed Central journal article supplement (PMC7080890; doi:10.1186/s13550-020-0608-4), 2020-03-19
Supplement: 13550_2020_608_MOESM1_ESM.pdf [file 13550_2020_608_MOESM1_ESM.pdf]

### Supporting information

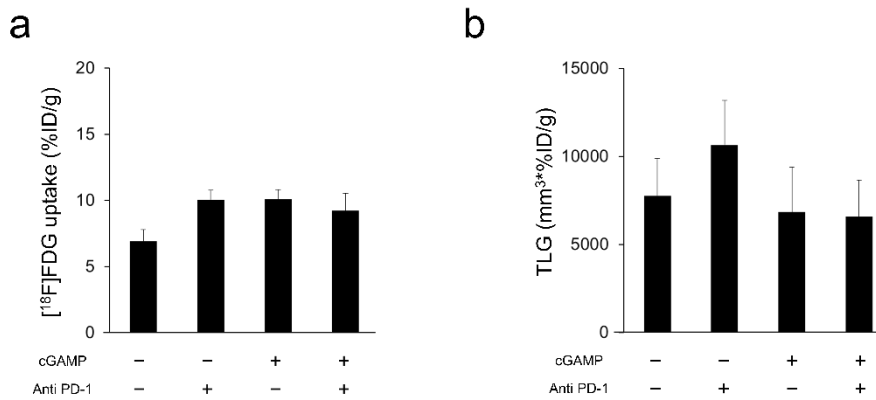

**Fig. S1**

Analysis of [<sup>18</sup>F]FDG-PET data to exclude necrotic regions of the tumor. **a** Mean<sub>30%</sub> [<sup>18</sup>F]FDG uptake calculated by PET-CT images in tumors on day 7 (n = 6-7). Data of the non-treatment group and anti PD-1 treated group were quoted and reanalyzed from [11]. **b** TLG calculated by PET-CT images in tumors on day 7 (n = 6-7). Data of the non-treatment group and anti PD-1 treated group were adopted and reanalyzed from [11]. Data represent the mean ± SEM.

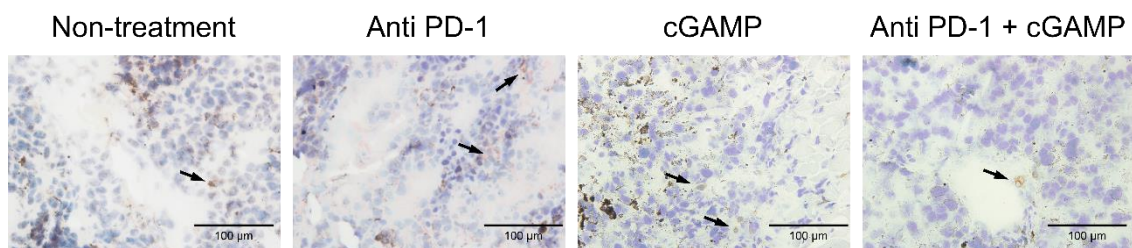

**Fig. S2**

CD3 staining of tumor samples in each group.

**Table S1**

| Non-treatment    | Anti PD-1         | cGAMP             | Anti PD-1 + cGAMP |
|------------------|-------------------|-------------------|-------------------|
| 86.8 ± 3.7 mg/dL | 101.3 ± 8.2 mg/dL | 74.0 ± 12.3 mg/dL | 76.0 ± 21.9 mg/dL |

Blood glucose levels on day 7 (n = 4). Data represent the mean ± SEM.
